# Supplementary material
Source: publisher figshare collection journal article supplement (https://brill.figshare.com/ndownloader/files/22964501)
Supplement: Supplementary file 1 [file 22964501]

## Sheet: Experiment1
Colony	Honey taken (g)	Crickets taken (g)	Workers on honey (#)	Workers on crickets (#)
1	0.0905	0.0882	8	2
2	0.342	0.027	16	0
3	0.224	0.0236	13	0
4	0.2485	0.0458	11	0
5	0.0804	0.0434	6	1
6	0.2158	0.052	7	0
7	0.186	0.0102	15	0
8	0.1848	0.01	11	1

## Sheet: Experiment2
Colony	Colony size	Run	Landmark treatment	Food treatment	Workers searching (#)	Maze-solving time (sec)
1	75	1	absent	honey	21	998
1		2	absent	honey	9	147
1		3	absent	honey	10	115
1		4	absent	honey	12	34
1		5	absent	honey	12	490
1		6	absent	honey	11	202
1		7	absent	honey	11	110
1		8	absent	honey	13	218
2	249	1	absent	crickets	23	347
2		2	absent	crickets	15	437
2		3	absent	crickets	14	192
2		4	absent	crickets	19	42
2		5	absent	crickets	16	75
2		6	absent	crickets	11	30
2		7	absent	crickets	24	74
2		8	absent	crickets	15	101
3	356	1	present	honey	4	275
3		2	present	honey	4	67
3		3	present	honey	5	40
3		4	present	honey	10	227
3		5	present	honey	10	194
3		6	present	honey	18	104
3		7	present	honey	12	141
3		8	present	honey	28	299
4	186	1	absent	honey	19	398
4		2	absent	honey	18	306
4		3	absent	honey	27	371
4		4	absent	honey	23	183
4		5	absent	honey	18	330
4		6	absent	honey	29	549
4		7	absent	honey	16	148
4		8	absent	honey	20	108
5	237	1	absent	crickets	20	420
5		2	absent	crickets	16	373
5		3	absent	crickets	13	170
5		4	absent	crickets	9	243
5		5	absent	crickets	13	607
5		6	absent	crickets	27	313
5		7	absent	crickets	20	234
5		8	absent	crickets	12	133
6	229	1	absent	crickets	17	674
6		2	absent	crickets	20	576
6		3	absent	crickets	12	912
6		4	absent	crickets	15	859
6		5	absent	crickets	15	345
6		6	absent	crickets	20	648
6		7	absent	crickets	23	493
6		8	absent	crickets	16	199
7	394	1	present	honey	2	1173
7		2	present	honey	24	554
7		3	present	honey	9	72
7		4	present	honey	11	105
7		5	present	honey	5	248
7		6	present	honey	7	235
7		7	present	honey	4	156
7		8	present	honey	17	97
8	113	1	present	honey	20	159
8		2	present	honey	12	98
8		3	present	honey	13	84
8		4	present	honey	10	189
8		5	present	honey	8	200
8		6	present	honey	11	196
8		7	present	honey	1	120
8		8	present	honey	13	369
9	70	1	absent	crickets	7	570
9		2	absent	crickets	17	252
9		3	absent	crickets	23	254
9		4	absent	crickets	11	131
9		5	absent	crickets	5	739
9		6	absent	crickets	22	653
9		7	absent	crickets
9		8	absent	crickets	18	991
10	96	1	absent	honey
10		2	absent	honey
10		3	absent	honey
10		4	absent	honey
10		5	absent	honey	7	1050
10		6	absent	honey	8	627
10		7	absent	honey	11	229
10		8	absent	honey	6	478
11	184	1	absent	honey	6	337
11		2	absent	honey	5	64
11		3	absent	honey	8	40
11		4	absent	honey	13	466
11		5	absent	honey	10	68
11		6	absent	honey	9	313
11		7	absent	honey	9	157
11		8	absent	honey	8	69
12	159	1	absent	crickets	10	851
12		2	absent	crickets	15	654
12		3	absent	crickets	11	296
12		4	absent	crickets	27	319
12		5	absent	crickets	13	426
12		6	absent	crickets	31	133
12		7	absent	crickets	23	159
12		8	absent	crickets
13	198	1	absent	honey	7	775
13		2	absent	honey	15	174
13		3	absent	honey	21	188
13		4	absent	honey	25	85
13		5	absent	honey	5	312
13		6	absent	honey	17	141
13		7	absent	honey	18	45
13		8	absent	honey	19	35
14	212	1	absent	honey	10	1079
14		2	absent	honey	9	169
14		3	absent	honey	3	45
14		4	absent	honey	5	30
14		5	absent	honey	2	25
14		6	absent	honey	12	73
14		7	absent	honey	6	54
14		8	absent	honey	12	74
15	292	1	present	crickets	22	238
15		2	present	crickets	9	514
15		3	present	crickets	21	576
15		4	present	crickets	25	239
15		5	present	crickets	22	315
15		6	present	crickets	22	206
15		7	present	crickets	21	219
15		8	present	crickets	25	461
16	305	1	present	crickets	10	609
16		2	present	crickets
16		3	present	crickets	4	60
16		4	present	crickets
16		5	present	crickets	9	233
16		6	present	crickets	7	146
16		7	present	crickets	11	197
16		8	present	crickets	15	200
17	244	1	present	honey
17		2	present	honey	15	788
17		3	present	honey
17		4	present	honey
17		5	present	honey
17		6	present	honey	23	725
17		7	present	honey	5	5
17		8	present	honey	19	160
18	228	1	present	crickets	22	669
18		2	present	crickets	9	1190
18		3	present	crickets	16	296
18		4	present	crickets	12	633
18		5	present	crickets	23	622
18		6	present	crickets	13	176
18		7	present	crickets	9	210
18		8	present	crickets	19	484
19	229	1	present	crickets	42	522
19		2	present	crickets	15	439
19		3	present	crickets	36	747
19		4	present	crickets	32	869
19		5	present	crickets	8	133
19		6	present	crickets	26	297
19		7	present	crickets	24	381
19		8	present	crickets	38	293
20	287	1	absent	crickets	50	380
20		2	absent	crickets	65	364
20		3	absent	crickets	45	229
20		4	absent	crickets	56	492
20		5	absent	crickets	18	204
20		6	absent	crickets	36	200
20		7	absent	crickets	46	212
20		8	absent	crickets	42	199
21	183	1	absent	honey	30	524
21		2	absent	honey	18	214
21		3	absent	honey	10	41
21		4	absent	honey	10	105
21		5	absent	honey	2	377
21		6	absent	honey	8	87
21		7	absent	honey	10	7
21		8	absent	honey	14	383
22	175	1	present	honey	27	491
22		2	present	honey	23	167
22		3	present	honey	18	50
22		4	present	honey	9	26
22		5	present	honey	7	128
22		6	present	honey	10	166
22		7	present	honey	8	99
22		8	present	honey	7	65
23	156	1	present	honey	23	213
23		2	present	honey	26	176
23		3	present	honey	15	106
23		4	present	honey	19	66
23		5	present	honey	13	196
23		6	present	honey	5	25
23		7	present	honey	5	29
23		8	present	honey
24	206	1	present	honey	17	433
24		2	present	honey	17	60
24		3	present	honey	17	25
24		4	present	honey	28	163
24		5	present	honey	6	40
24		6	present	honey	10	70
24		7	present	honey	6	47
24		8	present	honey	19	184
25	71	1	absent	crickets	7	1022
25		2	absent	crickets	8	98
25		3	absent	crickets	8	128
25		4	absent	crickets	13	489
25		5	absent	crickets	9	280
25		6	absent	crickets	8	288
25		7	absent	crickets	8	299
25		8	absent	crickets	11	441
26	91	1	absent	crickets	3	968
26		2	absent	crickets	4	52
26		3	absent	crickets	4	112
26		4	absent	crickets	10	121
26		5	absent	crickets	9	184
26		6	absent	crickets	4	163
26		7	absent	crickets	4	35
26		8	absent	crickets	8	296
27	122	1	absent	honey	9	266
27		2	absent	honey	6	384
27		3	absent	honey	8	170
27		4	absent	honey	7	122
27		5	absent	honey	1	677
27		6	absent	honey	8	322
27		7	absent	honey	3	159
27		8	absent	honey	1	119
28	78	1	absent	crickets	8	172
28		2	absent	crickets	5	605
28		3	absent	crickets	10	640
28		4	absent	crickets	12	791
28		5	absent	crickets	10	476
28		6	absent	crickets	4	401
28		7	absent	crickets	7	218
28		8	absent	crickets	8	369
29	161	1	present	honey	23	377
29		2	present	honey	7	382
29		3	present	honey	9	43
29		4	present	honey	13	69
29		5	present	honey	6	658
29		6	present	honey	7	147
29		7	present	honey	3	39
29		8	present	honey	4	34
30	111	1	present	honey	29	1131
30		2	present	honey	10	84
30		3	present	honey	7	221
30		4	present	honey	10	189
30		5	present	honey	3	98
30		6	present	honey	2	336
30		7	present	honey	4	128
30		8	present	honey	12	204
31	190	1	absent	honey	32	380
31		2	absent	honey	30	80
31		3	absent	honey	11	16
31		4	absent	honey	20	101
31		5	absent	honey	4	234
31		6	absent	honey	7	75
31		7	absent	honey	9	65
31		8	absent	honey	23	823
32	196	1	absent	honey	16	225
32		2	absent	honey	26	153
32		3	absent	honey	22	44
32		4	absent	honey	56	723
32		5	absent	honey	32	563
32		6	absent	honey	20	113
32		7	absent	honey	15	361
32		8	absent	honey	20	126
33	204	1	absent	crickets	30	196
33		2	absent	crickets	18	99
33		3	absent	crickets	27	23
33		4	absent	crickets	29	54
33		5	absent	crickets	25	416
33		6	absent	crickets	19	136
33		7	absent	crickets	19	49
33		8	absent	crickets	26	162
34	102	1	present	crickets	2	545
34		2	present	crickets	5	97
34		3	present	crickets	6	90
34		4	present	crickets	6	90
34		5	present	crickets	6	377
34		6	present	crickets	3	188
34		7	present	crickets	5	97
34		8	present	crickets	5	415
35	131	1	present	crickets	2	488
35		2	present	crickets	5	112
35		3	present	crickets	3	62
35		4	present	crickets	8	509
35		5	present	crickets	8	408
35		6	present	crickets	2	60
35		7	present	crickets	15	54
35		8	present	crickets	10	849
36	83	1	present	crickets	4	543
36		2	present	crickets	7	71
36		3	present	crickets	10	194
36		4	present	crickets	8	109
36		5	present	crickets	5	336
36		6	present	crickets	7	249
36		7	present	crickets	5	79
36		8	present	crickets	10	179
